# Supplementary material for: A pulsatile release platform based on photo-induced imine-crosslinking hydrogel promotes scarless wound healing
Source: PubMed Central journal article supplement (PMC7960722; doi:10.1038/s41467-021-21964-0), 2021-03-15
Supplement: 41467_2021_21964_MOESM1_ESM.pdf [file 41467_2021_21964_MOESM1_ESM.pdf]

SUPPLEMENTARY INFORMATION:

**Supplementary Table 1**

Mechanical property and characteristics of HA-NB hydrogel with PLGA-NB microcapsules.

|   | Component                            | Gelation Time (s) | Final Storage Modulus (Pa) | Compressive Modulus (kPa) | Adhesive Strength (kPa) |
|---|--------------------------------------|-------------------|----------------------------|---------------------------|-------------------------|
| 1 | 2.5% wt HA-NB/HA-CDH                 | 27±2              | 268±12                     | 14.6±2.6                  | 11.3±1.2                |
| 2 | 2.5% wt HA-NB/HA-CDH + 3% wt PLGA-NB | 28±2              | 307±23                     | 15.4±3.2                  | 12.3±0.6                |
| 3 | 2.5% wt HA-NB/HA-CDH + 6% wt PLGA-NB | 29±2              | 353±31                     | 19.1±2.3                  | 13.7±1.7                |
| 4 | 2.5% wt HA-NB/HA-CDH + 9% wt PLGA-NB | 30±3              | 412±28                     | 26.6±3.7                  | 12.1±0.9                |
| 5 | 2.5% wt HA-NB/HA-CDH + 6% wt PLGA    | 28±2              | 285±16                     | 17.3±2.1                  | 11.6±1.0                |
| 6 | 5% wt HA-NB/HA-CDH                   | 12±1              | 1543±87                    | 64.5±4.6                  | 21.3±2.1                |
| 7 | 5% wt HA-NB/HA-CDH + 6% wt PLGA-NB   | 14±2              | 1987±104                   | 70.4±5.4                  | 23.4±3.2                |

# Supplementary Figure 1

**A**

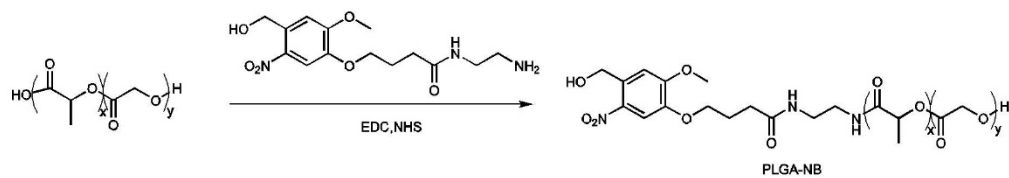

**B**

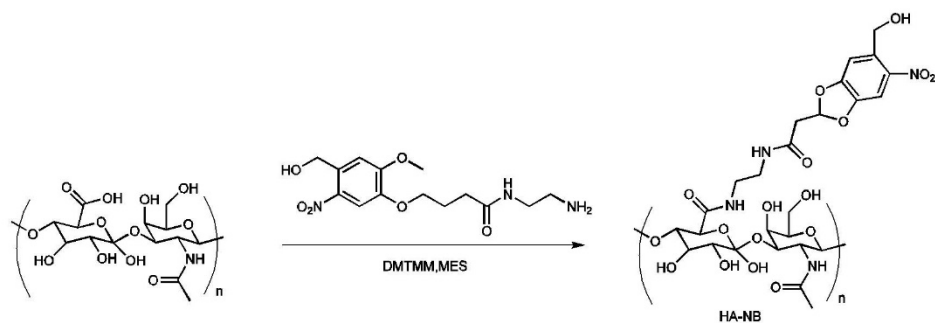

**C**

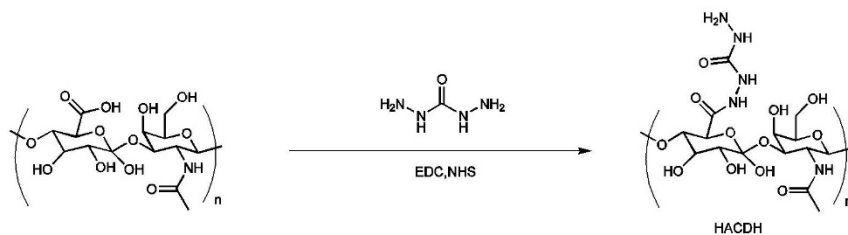

Supplementary Figure 1. Schematic illustration of the synthesis of the pre-gelling polymers: PLGA-NB (A); HA-NB (B); and HA-CDH (C).

## Supplementary Figure 2

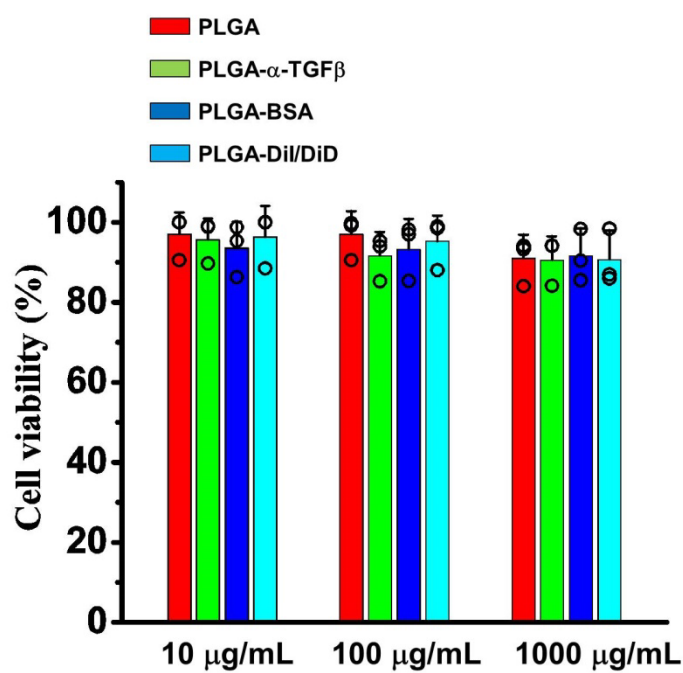

Supplementary Figure 2. Quantification of cell viability *in vitro* for empty PLGA-NB particles or particles loaded with different cargoes. n=3 independent samples. All error bars represent SD.

Source data are provided as a Source Data file.

# Supplementary Figure 3

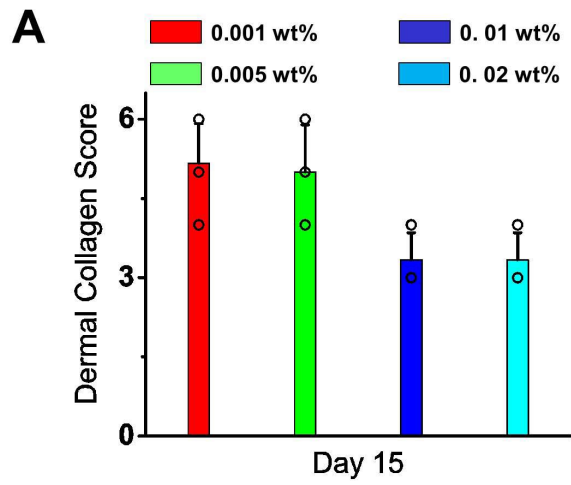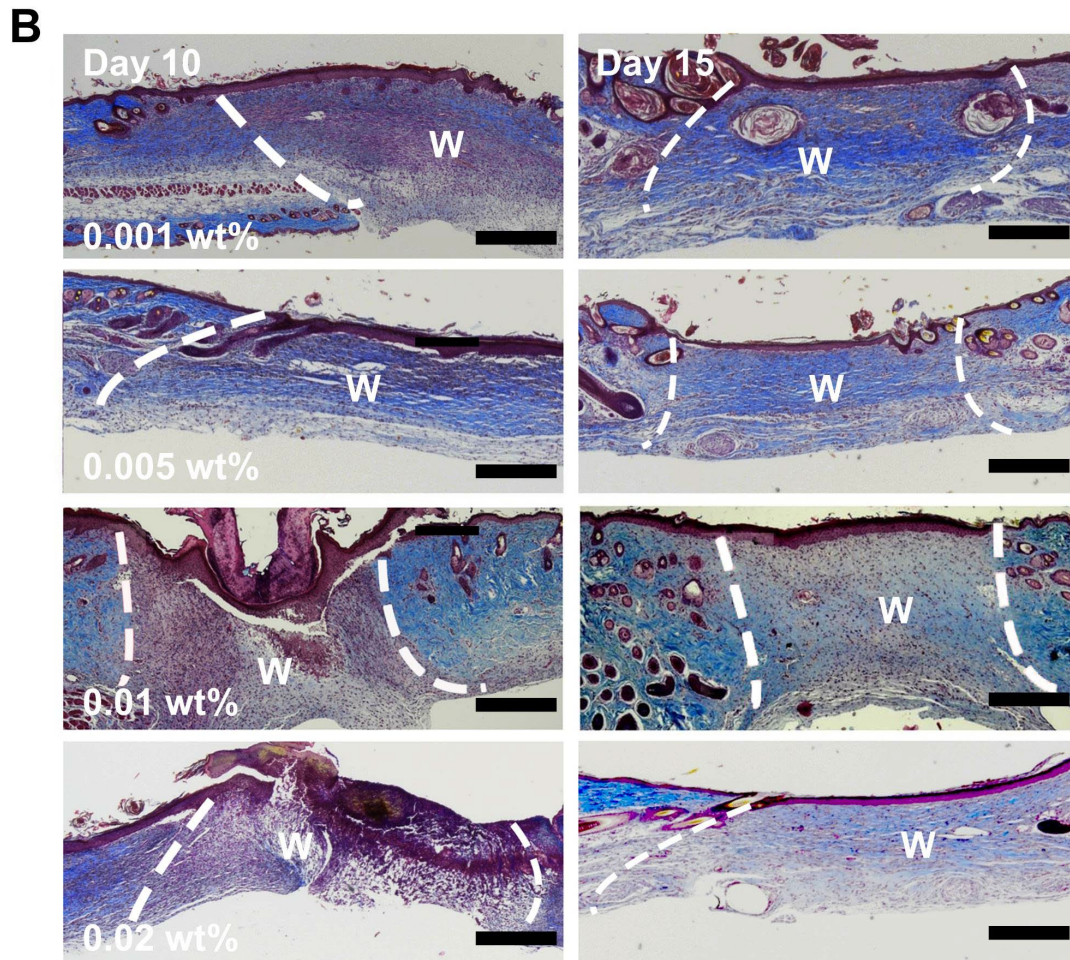

Supplementary Figure 3. (A) Quantification of collagen deposition and tissue fibrosis in healed wounds after TGF $\beta$  inhibitor treatment (in PLGA-NB capsules) at different dosages (0.001 wt% - 0.02 wt%). n=6 independent samples. All error bars represent SD. (B) Trichrome staining of skin sections treated with TGF $\beta$  inhibitor at different dosages. Dashed lines denote wound (W) boundary. Scale bar = 500  $\mu$ m. Source data are provided as a Source Data file.

## Supplementary Figure 4

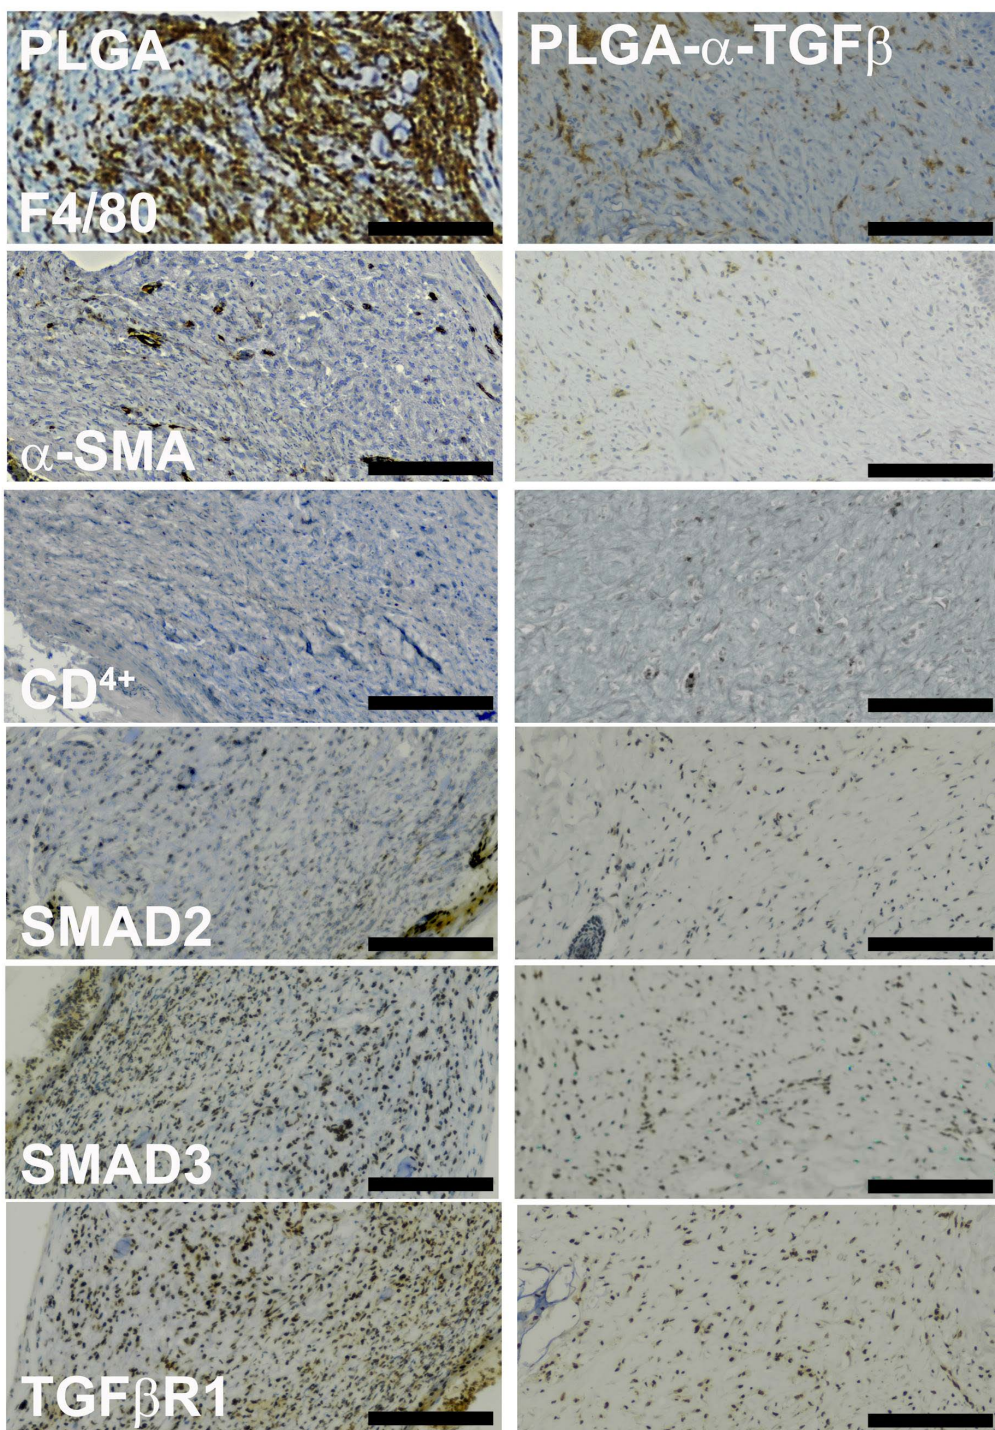

Supplementary Figure 4. Tissue sections were collected mouse skin wounds treated with control (Ctrl) or PLGA-NB capsules loaded with TGF $\beta$  inhibitors at 15 days post-wounding. Sections were stained with different antibodies to visualize TGF $\beta$  signaling and tissue inflammatory responses as indicated. Scale bar = 200  $\mu$ m.

## Supplementary Figure 5

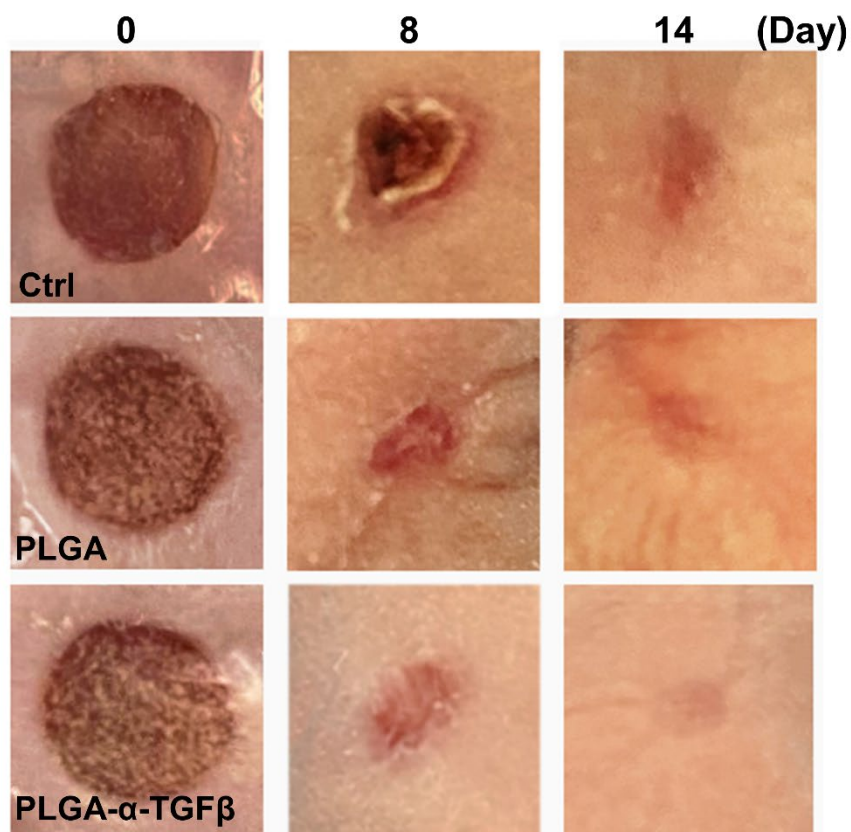

Supplementary Figure 5. Representative images of wounds in skin grafts at different time points. The wounds in skin grafts were treated with PLGA capsules with or without TGF $\beta$  inhibitor in HA-NB hydrogel, or alginate hydrogel as control (Ctrl), as shown in Figure 4A.



## Supplementary Figure 6

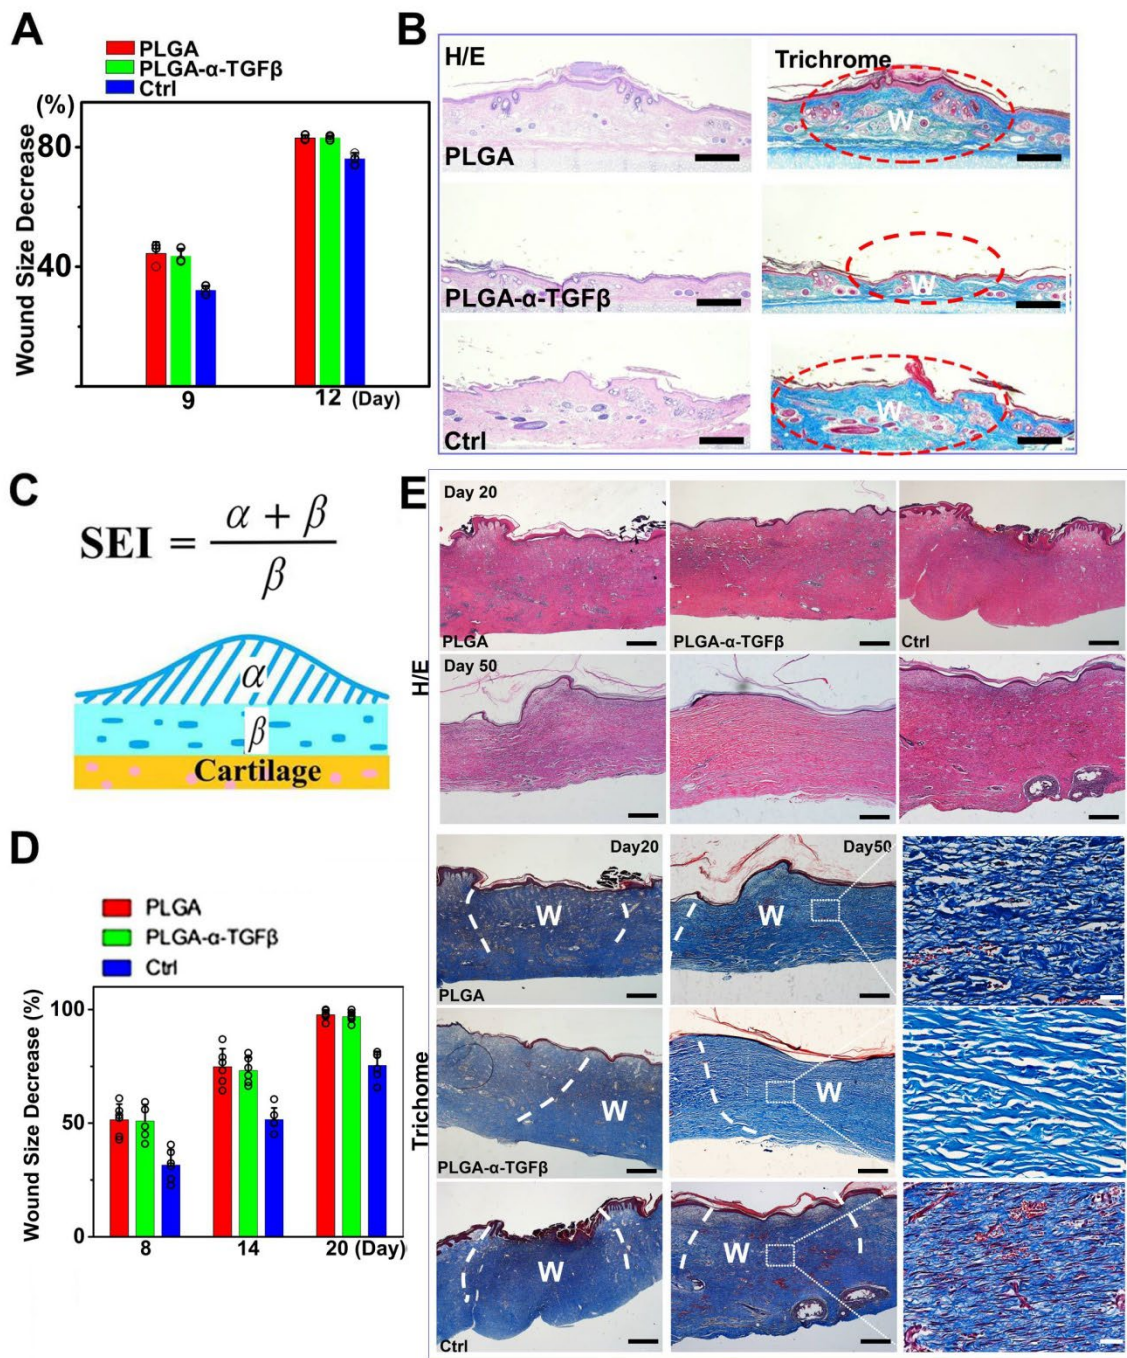

Supplementary Figure 6. Delivery of TGFβ inhibitor with PLGA-NB capsules can enhance skin wound closure while suppressing scarring. (A) Quantification of skin wound closure in rabbit ear

wounds after treatment with PLGA or PLGA particles loaded with TGF $\beta$  inhibitor. n=3 independent samples. Error bars represent SD. (B) H/E and trichrome staining of rabbit ear skin sections treated with PLGA capsules or PLGA capsules loaded with TGF $\beta$  inhibitor. Scale bar = 500  $\mu$ m. (C) Schematic illustration of SEI (scar elevation index) measurement and calculation. (D) Quantification of skin wound closure in porcine skin wounds after treatment with PLGA or PLGA capsules loaded with TGF $\beta$  inhibitor. n=6 independent samples. Error bars represent SD. (E) H/E and trichrome staining of porcine skin sections treated with PLGA capsules or PLGA capsules loaded with TGF $\beta$  inhibitor. Scale bar at Day 20, Day 50, Enlarged figure = 500  $\mu$ m, 200  $\mu$ m, 40  $\mu$ m, respectively. Source data are provided as a Source Data file.
